1 **Dynamic evolutionary history and gene content of sex chromosomes across diverse**  
2 **songbirds**

3

4 Luo-hao Xu<sup>1,2</sup>, Gabriel Auer<sup>2</sup>, Valentina Peona<sup>3</sup>, Alexander Suh<sup>3</sup>, Yuan Deng<sup>4</sup>, Shao-hong  
5 Feng<sup>4</sup>, Guo-jie Zhang<sup>4,5,6</sup>, Mozes P.K. Blom<sup>7</sup>, Les Christidis<sup>8,9</sup>, Stefan Probst<sup>10,11</sup>, Martin Irestedt<sup>7,\*</sup>,  
6 Qi Zhou<sup>1,2,\*</sup>

7

8 1. MOE Laboratory of Biosystems Homeostasis & Protection, Life Sciences Institute,  
9 Zhejiang University, Hangzhou, China

10 2. Department of Molecular Evolution and Development, University of Vienna, Vienna,  
11 Austria

12 3. Department of Evolutionary Biology, Evolutionary Biology Centre, Uppsala University,  
13 Uppsala, Sweden

14 4. China National Genebank, BGI-Shenzhen, Shenzhen, China

15 5. State Key Laboratory of Genetic Resources and Evolution, Kunming Institute of Zoology,  
16 Chinese Academy of Sciences, Kunming, China

17 6. Section for Ecology and Evolution, Department of Biology, University of Copenhagen,  
18 Copenhagen, Denmark

19 7. Department of Bioinformatics and Genetics, Swedish Museum of Natural History,  
20 Stockholm, Sweden

21 8. National Marine Science Centre, Southern Cross University, Coffs Harbour, NSW,  
22 Australia

23 9. School of BioSciences, University of Melbourne, Parkville, VIC, Australia

24 10. Department of Integrative Biology, University of California, Berkeley, Berkeley, United  
25 States

26 11. Department of Biology, Stanford University, Stanford, United States

27 \* Correspondence should be addressed to M.I. (Martin.Irestedt@nrm.se) or Q.Z.  
28 (zhouqi1982@zju.edu.cn)

29 **Abstract**

30 Songbirds have a species number almost equivalent to that of mammals, and are classic  
31 models for studying mechanisms of speciation and sexual selection. Sex chromosomes are  
32 hotspots of both processes, yet their evolutionary history in songbirds remains unclear. To  
33 elucidate that, we characterize female genomes of 11 songbird species having ZW sex  
34 chromosomes, with 5 genomes of bird-of-paradise species newly produced in this work. We  
35 conclude that songbird sex chromosomes have undergone at least four steps of recombination  
36 suppression before their species radiation, producing a gradient pattern of pairwise sequence  
37 divergence termed 'evolutionary strata'. Interestingly, the latest stratum probably emerged due  
38 to a songbird-specific burst of retrotransposon CR1-E1 elements at its boundary, or  
39 chromosome inversion on the W chromosome. The formation of evolutionary strata has  
40 reshaped the genomic architecture of both sex chromosomes. We find stepwise variations of Z-  
41 linked inversions, repeat and GC contents, as well as W-linked gene loss rate that are  
42 associated with the age of strata. Over 30 W-linked genes have been preserved for their  
43 essential functions, indicated by their higher and broader expression of orthologs in lizard than  
44 those of other sex-linked genes. We also find a different degree of accelerated evolution of Z-  
45 linked genes vs. autosomal genes among different species, potentially reflecting their diversified  
46 intensity of sexual selection. Our results uncover the dynamic evolutionary history of songbird  
47 sex chromosomes, and provide novel insights into the mechanisms of recombination  
48 suppression.

## 49 Introduction

50 Songbirds (Oscines, suborder Passeri) have over 5000 species and comprise the majority of  
51 passerines and nearly half of the all extant bird species<sup>1</sup>. This is a result of the largest avian  
52 species radiation occurred about 60 million years (MY) ago<sup>2</sup>. Facilitated by the development of  
53 genomics, many species besides the zebra finch (*Taeniopygia guttata*) are now transforming  
54 into important models for studying molecular patterns and mechanisms of speciation<sup>3,4</sup>,  
55 supergenes<sup>5</sup> and cognition<sup>6</sup>, out of their long history of ecological or behavioral studies, out of  
56 their long history of ecological or behavioral studies. One major reason that has been fueling  
57 biologists' fascination with songbirds is their staggering and diversified sexual traits. Many  
58 species possess striking plumage forms and colors, sophisticated songs and mating rituals, all  
59 of which can undergo rapid turnovers even between sister species. Theories predict that sex  
60 chromosomes play a disproportionately large role in speciation (the 'large X/Z' effect), sexual  
61 selection and evolution of sexually dimorphic traits<sup>7-9</sup>. However, the evolutionary history of  
62 songbird sex chromosome remains unclear, because there were few genomic studies  
63 characterizing songbird sex chromosomes except for the Collared Flycatcher (*Ficedula*  
64 *albicollis*)<sup>10</sup>. In contrast to the mammalian XY system, birds have independently evolved a pair  
65 of female heterogametic sex chromosomes that are usually heteromorphic in females (ZW) and  
66 homomorphic in males (ZZ). A recent cytological investigation of over 400 passerine species  
67 found a higher fixation rate of chromosome inversions on the Z chromosome than autosomes  
68 within species. Gene flow in the Z chromosome is thus more likely reduced in the face of  
69 hybridization<sup>11</sup>. Indeed, a significantly lower level of introgression, and a higher level of *Fst* in Z-  
70 linked genes compared to autosomal genes has been reported from studying pairs of recently  
71 diverged songbird species<sup>12-15</sup>. Such a large-Z pattern is probably caused by several factors  
72 which act in an opposite manner to the XY sex system. First, Z chromosomes are more often  
73 transmitted in males, thus are expected to have a higher mutation rate than the rest of the  
74 genome, due to the 'male-driven evolution' effect<sup>16</sup>. Second, as sexual selection more frequently  
75 targets males, the variation in male reproductive success will further reduce the effective  
76 population size of Z chromosome from three quarters of that of autosomes<sup>17</sup>. The consequential  
77 stronger effect of genetic drift is expected to fix excessive slightly deleterious mutations on the Z  
78 chromosome, and lead to a faster evolutionary rate than on autosomes (the 'fast-Z' effect)<sup>18</sup>.  
79 This has been demonstrated in the Galloanserae (e.g., chicken and duck) species, those of  
80 which undergo strong sperm competition, i.e., more intensive male sexual selection, exhibit a  
81 larger difference between the Z chromosome and autosomes in their evolutionary rates<sup>19</sup>.

82 In contrast to the avian Z chromosome, or more broadly the mammalian XY  
83 chromosomes, the genomic studies of avian W chromosomes, especially those of songbirds  
84 have not started only until recently<sup>10,20,21</sup>. This is because most genomic projects prefer to  
85 choose the homogametic sex (e.g., male birds or female mammals) for sequencing, in order to  
86 avoid the presumably gene-poor and highly repetitive Y or W chromosomes. The Y/W  
87 chromosomes have undergone suppression of recombination to prevent the sex-determining  
88 gene or sexually antagonistic genes (beneficial to one sex but detrimental to the other) from  
89 being transmitted to the opposite sex<sup>22</sup>. As a result, interference between linked loci ('Hill-  
90 Robertson' effect) reduces the efficacy of natural selection and drives the ultimate genetic decay  
91 of non-recombining regions of Y/W chromosomes<sup>23</sup>. This process can be accelerated by  
92 positive selection targeting, for example, male-related genes on the Y chromosome<sup>24</sup>; or by  
93 background selection purging the deleterious mutations from highly dosage-sensitive genes<sup>25</sup>.  
94 Simulation showed that both forces play a different role at different stages of Y/W  
95 degeneration<sup>26</sup>. Both have been implicated in analyses of mammalian<sup>24,27</sup> and *Drosophila*<sup>28,29</sup> Y-  
96 linked genes. However, no evidence has been found for female-specific selection among the W-  
97 linked genes (also called gametologs) of chicken<sup>21</sup> or flycatcher<sup>30</sup>.

98 Intriguingly, in both birds<sup>20</sup> and mammals<sup>31</sup>, as well as several plant species (e.g. *Silene*  
99 *latifolia*<sup>32</sup>), recombination suppression has proceeded in a stepwise manner presumably through  
100 chromosome inversions, leaving a stratified pattern of sequence divergence between sex  
101 chromosomes termed 'evolutionary strata'<sup>33</sup>. Eutherian mammalian X and Y chromosomes have  
102 been inferred to share at least three strata, with another two more recent ones shared only  
103 among catarrhines (old world monkeys and great apes)<sup>27</sup>. It has been recently discovered that  
104 the history and tempo of avian sex chromosome evolution is much more complicated than that  
105 of mammals<sup>20</sup>. All bird sex chromosomes only share the first step of recombination suppression  
106 (stratum 0, Aves S0) encompassing the avian male-determining gene *DMRT1*. This was  
107 followed by the independent formation of S1 in the Palaeognathae (e.g., ratites and tinamous)  
108 and in the ancestor of the Neognathae (all other extant avian radiations). Ratites have halted  
109 any further recombination loss and maintained over two thirds of the entire sex chromosome  
110 pair as the exceptionally long recombining pseudoautosomal regions (PAR). Therefore, their W  
111 chromosomes are unusually homomorphic and gene-rich comparing to the Z chromosomes. In  
112 contrast, all species of Neognathae examined have suppressed recombination throughout most  
113 regions of the sex chromosomes with short and varying sizes of PAR<sup>34</sup>. Overall, avian W  
114 chromosomes seem to have retained more genes and decayed at a slower rate than the  
115 mammalian Y chromosomes. Furthermore, sexually monomorphic species (e.g., most ratites)

116 seem to differentiate even slower than sexually dimorphic species (chicken and most Neoaves)  
117 in their sex chromosomes, consistent with the hypothesis that sexually antagonistic genes have  
118 triggered the expansion of recombination suppression between sex chromosomes<sup>35</sup>. However,  
119 due to the ratites' deep divergence from other birds, and also an expected much lower mutation  
120 rate due to their larger body size and longer generation time, it is unclear what the actual  
121 influence of sexual selection is on the rate of sex chromosome evolution. All Neoaves species  
122 share one stratum S2, with the more recent evolutionary history of sex chromosomes of  
123 songbirds unclear. So far, only one songbird, the collared flycatcher has been extensively  
124 characterized for its W-linked genes<sup>30</sup>, whose number is within the range of 46 to 90 W-linked  
125 genes reported for other Neoaves<sup>20</sup>. To elucidate the evolutionary history of songbird sex  
126 chromosomes, we produced high-quality female genomes of five birds-of-paradise (BOP).  
127 Together with a re-analysis of 6 other published female genomes of songbird species<sup>30,36-39</sup>, our  
128 analyses cover the two major songbird lineages (Corvida and Passerida) that rather diverged in  
129 the last 50 MY<sup>2,40</sup>.

130

## 131 **Results**

### 132 **Characterization of songbird sex chromosome sequences**

133 We produced between 36-150 fold genomic coverage of sequencing data for each BOP species,  
134 and performed *de novo* genome assembly followed by chromosome mapping using the great tit  
135 (*Parus major*) genome as reference<sup>6</sup>. The high continuity and completeness of the draft  
136 genomes are reflected by their scaffold N50 lengths (all >3 Mb except for the raggiana BOP,  
137 *Paradisaea raggiana*) and BUSCO core gene completeness scores (92.9% to 94.0%)  
138 (**Supplementary Table 1**). To reconstruct the evolutionary history of sampled songbird sex  
139 chromosomes, we first identified the sex-linked sequences from the draft genome of each  
140 species. We searched for the scaffolds from sexually differentiated regions (SDR) as those that  
141 show half the female sequencing depth of autosomes (**Fig. 1A, Supplementary Fig. 1**).  
142 Scaffolds from putative PARs were inferred by their homology to that of flycatcher<sup>41</sup>, and also  
143 sequencing depth similar to autosomes. It is noteworthy that our method cannot identify very  
144 recent fusion/translocation of autosomal fragments to the sex chromosome pair ('neo-sex'  
145 chromosome), as in the case of warblers<sup>42</sup>. All the studied songbirds have a short putative PAR  
146 ranging from 564 kb to 781 kb. We then categorized SDR sequences as either Z- or W-linked  
147 with the expectation that the W chromosome would diverge much faster than the homologous Z  
148 chromosome of the same species, when being compared to the Z chromosome of an outgroup  
149 species (**Materials and Methods**), as a result of rapid accumulation of deleterious mutations

150 and repetitive elements after recombination suppression. It is possible that Z-linked paralogs,  
151 although not expected to be abundant in the compact avian genomes<sup>36</sup>, would confound our  
152 identified W-linked sequences by showing a similar sequence divergence pattern. Thus, among  
153 the five species with male sequencing data, we further verified the sex-linkage by confirming all  
154 the putative W-linked scaffolds with a clear female-specific pattern (**Fig. 1A, Supplementary**  
155 **Fig. 2**). The assembled lengths of the largely euchromatic parts of W chromosomes range from  
156 1.33 to 6.52 Mb, corresponding to only 1.9% to 8.5% of the Z chromosome length across  
157 species (**Fig. 1B, Supplementary Table 2**), probably as a result of large deletions and massive  
158 invasions of repetitive elements which might be difficult to assemble with existing technologies.  
159 Indeed, the repeat content of the assembled W chromosomes is 2.5 to 4.9 fold higher than that  
160 of Z chromosomes on the chromosome-wide average (**Supplementary Fig. 3 and Table 2**),  
161 consistent with the patterns of W chromosomes of chicken and flycatcher<sup>43,44</sup>. We have not  
162 found shared syntenic W-linked regions across species that may have been deleted in the  
163 ancestor of songbirds compared to the chicken or ostrich genome, as suggested by previous  
164 cytological studies<sup>45</sup>.

165

#### 166 **Age-dependent genomic impact of evolutionary strata**

167 If recombination was suppressed between sex chromosomes in a stepwise manner, we expect  
168 to find a gradient of Z/W sequence divergence levels along the chromosome sequence of the Z  
169 chromosome, like what has been reported along the human X chromosome<sup>46</sup>. Previous work  
170 showd that the Z chromosomes of the Neognathae have undergone dramatic intrachromosomal  
171 rearrangements which resulted in a misleading extant synteny for ordering different evolution  
172 strata<sup>20</sup>. By contrast, the Palaeognathae (e.g. emu *Dromaius novaehollandiae* and ostrich  
173 *Struthio camelus*) have maintained highly conserved sequence synteny even with reptile  
174 species, with over two thirds of their sex-linked regions still recombining as an appropriate  
175 approximate of proto-sex chromosomes of all bird species<sup>20</sup>. We first confirmed these patterns  
176 by comparative mapping of the nearly chromosome-level assemblies of Z chromosomes of  
177 collared flycatcher, hooded crow (*Corvus corone*)<sup>47</sup> vs. chicken and emu (**Fig. 2A**). This allows  
178 us to reconstruct the spanned regions of S0 shared by all birds, and a part of S1 shared by all  
179 Neognathae species in the studied songbird genomes by their homology to the emu genome.  
180 They are mapped as two continuous regions on the emu Z chromosome, but have become  
181 severely reshuffled into dispersed fragments in songbirds (**Fig. 2A, Supplementary Fig. 4-5**).  
182 Two recently formed strata (Neoaves S2 and S3) are highly conserved for their synteny across  
183 avian species, and each show significantly ( $P < 0.05$ , Wilcoxon test) different levels of Z/W



184 sequence divergence (**Fig. 2B, Supplementary Fig. 6**), GC3 (GC content at the third codon  
185 positions, **Supplementary Fig. 7**) and Z-linked long terminal repeat (LTR) content (**Fig. 2C,**  
186 **Supplementary Fig. 7**) from each other. The drastic change of Z/W sequence similarity allows  
187 us to precisely map the boundaries between these two strata. In general, a series of  
188 recombination suppression has reshaped the genomic architecture of Z chromosomes in a  
189 chronological order. Regions of younger strata exhibit much fewer Z-linked intrachromosomal  
190 rearrangements between species, suggesting the reduced selective constraints on gene  
191 synteny after recombination was suppressed in the older strata<sup>48</sup>. In particular, GC3 content  
192 decreases, while the repeat content increases by the age of stratum. This is probably because  
193 of weaker effects of GC-biased gene conversion (gBGC)<sup>49</sup>, and purifying selection against TE  
194 insertions<sup>50</sup> under reduced recombination, both of which have been acting for a longer time  
195 within Z-linked regions of older strata. Consistently, a similar pattern has also been found  
196 contrasting PAR vs. the remaining Z-linked regions in the collared flycatcher<sup>41</sup>.

197

#### 198 **Lineage-specific burst of retrotransposon probably has induced recombination** 199 **suppression between sex chromosomes**

200 The distribution of long interspersed nuclear elements (LINEs), mainly the retrotransposon  
201 chicken repeat 1 (CR1) elements shows an exceptional pattern compared to that of LTR  
202 elements (**Fig. 2C, Supplementary Fig. 7**) associated with the age of strata. S3 presents a  
203 similar proportion of CR1 with S0 that is much higher than the rest of the Z-linked regions. A  
204 close examination shows that this is due to the specific accumulation of CR1 elements at the  
205 boundary between PAR and S3. Such a burst of CR1, particularly only the CR1-E1 subfamily<sup>51</sup>,  
206 extends into about one third of the entire S3 region and is shared by all investigated songbirds  
207 but absent in the deep-branching passerine rifleman (*Acanthisitta chloris*) and other Neoaves  
208 (**Fig. 2D, Supplementary Fig. 8**). The exact boundary sequence is not assembled probably due  
209 to such accumulation of CR1-E1, and also previously reported multiple deletions in passerines  
210 that removes a gene *DCC* (Deleted in Colorectal Carcinoma) highly conserved across other  
211 vertebrates<sup>52</sup>. This gene is responsible for axon guidance for brain midline crossing and has  
212 independently been lost in some but not all passerines and Galliformes<sup>53</sup>.

213 In addition, we find evidence that the burst of CR1-E1 elements coincides with the S3  
214 emergence. Our phylogenetic reconstruction of Z- and W-linked gametolog sequences shows  
215 that songbird-derived sequences are always grouped by chromosome instead of species,  
216 compared to outgroup birds (**Fig. 2E, Supplementary Fig. 9-12**). This indicates that all  
217 songbirds share four evolutionary strata, with the latest stratum S3 formed after the divergence

218 between songbirds and the rifleman. The highly conserved synteny between songbird species,  
219 and between songbirds and chicken of S3 on the Z chromosome (**Fig. 2A, Supplementary Fig.**  
220 **5**), suggests that there was no chromosomal inversion on the Z chromosome at S3, and the  
221 recent burst of the CR1-E1 subfamily probably contributed to the formation of S3, although we  
222 cannot exclude the contribution of possible W-linked chromosomal inversions. Interestingly,  
223 other CR1 subfamilies (CR1-E4, CR1-E5, CR1-E6) have an independent burst at the PAR/S3  
224 boundary in rifleman (**Fig. 2D, Supplementary Fig. 8 and Table 3**). Given that this boundary  
225 region has been shown to have frequent but different degrees of multiple gene loss in different  
226 lineages of birds<sup>52,53</sup>, it is very likely a hotspot for structural changes (including LINE  
227 accumulation) that have recurrently contributed to the independent formation of S3 in many bird  
228 species.

229

### 230 **Fast-Z pattern of songbirds implies dynamic evolution of sexual selection**

231 The formation of evolutionary strata has subjected the Z chromosome to male-biased  
232 transmission and a reduced effective population size, which are expected to produce faster  
233 mutation and evolutionary rates of Z-linked genes<sup>17</sup>. Indeed, we found a larger branch-specific  
234 synonymous substitution rate (dS) of Z-linked genes (statistically not significant), but a  
235 significantly smaller dS of W-linked genes, compared to that of autosomal genes ( $P < 0.01$ ,  
236 Wilcoxon rank sum test, **Supplementary Fig. 13**), as a result of male-driven evolution. The  
237 branch-specific evolutionary rates ( $\omega$ ) measured by the ratios of nonsynonymous substitution  
238 rate (dN) over dS have significantly ( $P < 0.01$ , Wilcoxon rank sum test, **Supplementary Fig. 14**)  
239 increased for both Z- and W-linked gametologs relative to autosomal genes, indicating a ‘fast-Z’  
240 effect and degeneration of W-linked genes (see below). Previous simulation work and  
241 experimental evidence in Galloanserae have suggested that different degrees of sexual  
242 selection targeting males will influence the male-mating success, hence the genetic drift effect  
243 on the Z chromosome to a different degree<sup>17,19</sup>. Songbirds, especially BOPs, have been  
244 frequently used as textbook demonstrations for sexual selection, though the long-term  
245 evolutionary history of sexual selection remained unclear. To reconstruct this, we approximate  
246 the intensity of sexual selection targeting males by measuring the fast-Z effect (Z/A value, the  
247 ratio of branch-specific  $\omega$  values of Z-linked genes vs. autosomal genes) in a phylogenetic  
248 context (**Fig. 3, Supplementary Table 4**). The varying Z/A values at different lineages suggest  
249 a dynamic change of intensity of sexual selection, even among the five BOP species that  
250 diverged within the last 15 MY<sup>54</sup>. While the significant (permutation test,  $P < 0.05$ ) fast-Z pattern  
251 of the sexually monochromatic American crow (*Corvus brachyrhynchos*) may reflect the sexual



252 selection acting on the ancestral lineage leading to the Corvidae (crows, jays and allies), a lack  
253 of such a pattern in the raggiana BOP and magnificent BOP (*Cicinnurus magnificus*) is  
254 somewhat unexpected. These species are known for their lekking behaviors<sup>55</sup>, with which very  
255 few males dominate almost all females for copulation through outcompeting other males with  
256 displays. This produces a strongly biased male-mating success, and direct challenge for  
257 maintaining genetic variation in the population ('the lekking paradox')<sup>56</sup>. Very few field  
258 quantitative studies have been performed on BOP species, and it will be interesting to  
259 investigate whether raggiana and magnificent BOPs female individuals may solve the 'lekking  
260 paradox' by changing their mating preference, and in fact mate with more males than is  
261 presumed.

262

### 263 **Conserved gene content of the songbird W chromosomes**

264 In contrast to the dynamic evolution of Z-linked genes and sequences, W chromosomes of all  
265 the studied songbirds have undergone dramatic gene loss but exhibit an unexpected  
266 conservation of the retained gene repertoire across species. The numbers of assembled W-  
267 linked genes range from 31 in house sparrow (*Passer domesticus*) to 63 in the king BOP  
268 (*Cicinnurus regius*), compared to about 600 to 800 Z-linked genes in each species (**Fig. 4A,**  
269 **Supplementary Tables 2 and 7**). These numbers are likely an underestimate because genes  
270 embedded in highly repetitive regions maybe missing from the current W chromosome  
271 assemblies. In general, Corvida species retain more W-linked genes than Passerida species  
272 (**Supplementary Table 5**), likely due to their longer generation time thus a lower mutation rate.  
273 Most W-linked genes are single-copy without lineage-specific expansion, except for HINT1W  
274 (**Supplementary Fig. 15**). Despite the relative rarity of gene duplication in birds compared to  
275 mammals<sup>57</sup>, we find one W-linked gene that is a duplicated copy from an autosomal gene *NARF*  
276 in American crow (**Supplementary Fig. 16**). This duplicated gene is also present in another  
277 Corvida species *Lycocorax pyrrhopterus* (Alexander Suh, personal communication), suggesting  
278 that the duplication event likely occurred in the ancestor of Corvida. It will be interesting to see  
279 whether this gene shows signatures of female-specific selection, e.g, novel patterns of ovary-  
280 specific expression, which drives its fixation on the W. Fifty-seven genes are shared by at least  
281 one Corvida and another Passerida species, and 23 genes are shared between at least one  
282 songbird species and the chicken<sup>21</sup>. This suggests they were still preserved on the W  
283 chromosome before the divergence of passerine or Neognathae species. Interestingly, despite  
284 the independent origin of S2 in the chicken and Neoaves<sup>20</sup>, all the chicken W-linked genes but  
285 one are also found in passerines, indicating similar underlying evolutionary forces governing

286 their convergent retention since Galloanserae and Neoaves diverged from each other 89 MY  
287 ago.

288 To examine such forces, we perform gene ontology (GO) analyses on the 79 genes that  
289 are present on the W chromosome of at least one songbird species. They are enriched ( $P <$   
290 0.01, Fisher's exact test) for two GO terms of 'DNA binding' and 'transcription factor activity,  
291 sequence-specific DNA binding' (**Supplementary Table 6**). This suggests that similar to the  
292 mammalian Y-linked genes<sup>27</sup>, some W-linked genes are retained for their important functions of  
293 regulating gene activities elsewhere in the genome. The Z-linked homologs of lost genes evolve  
294 significantly ( $P < 0.01$ , Wilcoxon rank sum test) faster with their  $\omega$  ratios higher than those of the  
295 retained genes on the W chromosome (**Fig. 4B, Supplementary Fig. 17**). This shows a  
296 different selective pressure acting on these two sets of genes on the proto-sex chromosomes.  
297 As this pattern maybe confounded by the 'faster-Z' effect of hemizygous Z-linked genes, we  
298 further study the autosomal orthologs of these genes in the green anole lizard (*Anolis*  
299 *carolinensis*). We find that the orthologs of retained genes have significantly ( $P < 1.497e-05$ ,  
300 Wilcoxon rank sum test, **Fig. 4C**) higher expression levels in all lizard tissues of both males and  
301 females, and also a broader tissue expression pattern than those of the lost genes across all the  
302 tissues (**Fig. 4D**). The patterns are also consistent among the four songbird evolutionary strata.  
303 These results are robust if we use emu to infer the ancestral expression pattern  
304 (**Supplementary Fig. 18**), whose sex chromosomes are largely a PAR. Consistent with the  
305 result of collared flycatcher<sup>10</sup>, we find no evidence that female-specific selection may prevent  
306 the gene loss, or drive certain genes to undergo positive selection on the songbird W  
307 chromosomes. We found no excess of ovary-biased lizard orthologs among those of the  
308 retained W-linked genes: only 6 out of 72 (8.3%) are ovary-biased while the genome-wide  
309 proportion is about 20%.

### 310 311 **Comparing gene loss between avian W chromosomes and mammalian Y chromosomes**

312 Overall, 4.6% to 9.2% of single-copy W-linked genes per songbird species (**Fig. 4A**), compared  
313 to 1.6% to 3.0% single-copy Y-linked genes per mammalian species<sup>27</sup> have been retained for  
314 their essential or sex-specific functions. A seemingly high retention ratio of W-linked genes in  
315 birds can be partially attributed to the generally much lower mutation rate of W chromosome  
316 relative to Y chromosome by male-driven evolution effect (**Supplementary Fig. 13**), assuming a  
317 similar generation time between mammals and birds. In addition, a much more frequent and  
318 stronger sex-specific selection acting on the Y chromosome than on the W chromosome,  
319 sometimes driving the massive expansion of Y-linked gene copies with male-related function<sup>24</sup>,

320 probably also has contributed to a faster rate of Y chromosome gene loss by the hitchhiking  
321 effect<sup>24,26</sup>. To scrutinize the tempo of gene loss throughout the evolution of songbird sex  
322 chromosomes, we conservatively reconstructed the numbers of retained W-linked gametologs  
323 at each phylogenetic node of the avian tree (**Fig. 5A, Supplementary Table 8**), by identifying  
324 the genes present on any of the studied avian W chromosomes. We find that within each  
325 stratum, the percentage of gene loss is always much larger at an earlier evolutionary time point  
326 than in the recent ones, and this is consistent between birds and mammals (**Fig. 5B**). Thus the  
327 majority of gene loss has probably occurred during the early stage of W or Y chromosome  
328 evolution, and the rate of gene loss dramatically decreases by the less retained genes. Although  
329 convergent gene loss may cause an overestimation of lost genes at more ancestral time points  
330 (e.g., in S0 region), this probably has little influence on our estimate in the most recent songbird-  
331 specific stratum S3 which has already lost 69.8% of the W-gametologs within 50 MY. We also  
332 find that the retained genes of songbird W chromosomes are often close to each other  
333 (**Supplementary Fig.19**), suggesting large sequence deletions have had an important  
334 contribution to drastic gene loss.

335 The decrease of gene loss rate on Y/W chromosomes through evolutionary time can be  
336 explained by a weaker Hill-Robertson effect that the less retained genes can induce, which has  
337 been previously shown in a simulation study<sup>26</sup>. Thus, the ancestral gene number of older  
338 evolutionary strata which would have undergone more serious gene loss must have a larger  
339 influence on the extant number of retained genes. A lower rate of retained mammalian Y-linked  
340 genes relative to avian W-linked genes, besides the cause of male-driven evolution, can be also  
341 attributed to the fact that the first two or three mammalian evolutionary strata emerged before  
342 the divergence of eutherians which together account for over 93.2% of the entire gene content  
343 of ancestral Y chromosome, while those of birds only account for 53.3% of the entire ancestral  
344 W-linked gene content (**Fig. 5C**).

## 345 346 **Discussion**

347 The evolution of sex chromosomes is usually, but not always (e.g., in frogs<sup>58</sup>, ratite birds<sup>20</sup> and  
348 pythons<sup>59</sup>), marked with episodes of recombination suppression that eventually restricts the  
349 recombining region to one or two small PARs at the end of the sex chromosomes. The resulting  
350 patterns of evolutionary strata have been widely reported in many animal and plant species,  
351 with the responsible formation mechanism presumed to be chromosomal inversions<sup>60</sup>. Indeed,  
352 footprints of inversions in the latest two strata between mammalian X and Y chromosomes have  
353 been found by examining the synteny order between X/Y, and particularly the X-linked boundary

354 sequence that has been disrupted into two dispersed sequences on the Y chromosome<sup>61</sup>. In  
355 songbirds, we show here that four evolutionary strata were formed before their species radiation.  
356 Importantly, we provide evidence suggesting an alternative scenario of recombination  
357 suppression. We find in the latest stratum S3, a genome-wide burst of a certain transposable  
358 element (TE) led to its specific accumulation at the mutation/insertion hotspot near the PAR  
359 boundary of the sex chromosomes (**Fig. 2, Supplementary Table 3**), which probably further  
360 mediated recombination suppression. It has been reported with some exceptions, in many  
361 species that local recombination rates and abundance of TE elements generally have a  
362 negative association, with their causal relationship difficult to be disentangled<sup>50</sup>. In the case of  
363 the songbird S3 region, several patterns suggest that TE accumulation might be the cause  
364 rather than the result of recombination suppression. First, in several species (e.g., Lawes's  
365 parotia (*Parotia lawesi*) and the king BOP, **Fig. 2D, Supplementary Fig. 8**), the responsible  
366 CR1-E family is also enriched close to the PAR boundary, where normal levels of recombination  
367 can be expected. Second, the abundance of CR1-E gradually decreases further away from the  
368 boundary, which also has undergone genomic deletions or rearrangements independently in  
369 other bird species<sup>52,53</sup>, thus is likely to be a mutation hotspot. Third, only CR1-E repeats, but not  
370 any other type of CR1 or repeat families, are enriched at the PAR/S3 boundary. These results  
371 are not likely to be expected if S3 stratum formation occurred before the CR1-E accumulation,  
372 which predicts a uniformly distributed accumulation of various kinds of repeat elements (e.g.,  
373 LTR elements, **Supplementary Fig. 20**) by Hill-Robertson interference effects that would not  
374 extend into the PAR. Indeed, our comparative analyses between species suggest no Z-linked  
375 inversion in S3 (**Fig. 2A, Supplementary Fig. 5**), though we cannot exclude the possibility of a  
376 W-linked inversion that may have instead contributed to the formation of S3. The verification of  
377 the latter requires future improvements of genome assembly using for example,  
378 PacBio/Nanopore sequencing technology to assemble the highly repetitive W-linked sequence.

379 Under our proposed scenario, TEs probably reduced the recombination rate in PAR  
380 through, for example, changing the chromatin structure or disrupting recombination hotspots<sup>50</sup>.  
381 The CR1-E retrotransposon accumulation occurred at the mutation hotspot located at PAR/S3  
382 boundary despite the selection against its deleterious effects of disrupting gene functions. This  
383 has resulted in partial or complete deletion of several genes in songbirds<sup>52,53</sup>. However, the  
384 consequential reduction of recombination rate can provide the selective advantage of  
385 accelerating the fixation of pre-existing sexually antagonistic (SA) alleles in PAR through sex-  
386 biased transmission; or subjecting the PAR for the 'fast-Z' evolution by male-driven evolution  
387 effect (**Fig. 3**) and increasing its exposure for male-biased selection, so that novel SA alleles

388 may more frequently emerge and become fixed. The latter has been implicated by the recent  
389 findings in songbirds that male-specific trait genes, for example those related to sperm  
390 morphology<sup>62</sup> or plumage colors<sup>63</sup>, which have recently become diverged within or between  
391 populations, are enriched on the Z chromosome. In addition, TE accumulation is likely to  
392 increase the chance of chromosome inversions through ectopic recombination, or by reducing  
393 the selective constraints on gene synteny<sup>48,50</sup>. The latter is supported by our result that older  
394 evolutionary strata have undergone more Z-linked genomic rearrangements between songbird  
395 species than the younger ones (**Fig. 2A**), which creates a positive feedback once the  
396 recombination suppression was initiated. This provides a mechanistic explanation for the more  
397 frequent fixation of Z-linked inversions found among passerines.

398 While the Z chromosome is predicted to accumulate dominant male-beneficial mutations,  
399 the W chromosome is expected to accumulate female-beneficial mutations responding to  
400 female-specific transmission<sup>64</sup>. Here we find that more genes to have been retained on the W  
401 chromosomes of songbirds than that of chicken (**Fig. 4**). However, both previous works on the  
402 chicken and collared flycatcher<sup>21,30</sup>, as well as our present study, have not found evidence for  
403 such ‘feminization’ of W chromosome. This is in contrast to multiple reported cases of  
404 ‘masculinization’ of the Y chromosome in the ancient mammalian Y chromosome systems<sup>24</sup> or  
405 the recently-evolved Y chromosome of *Drosophila miranda*<sup>28</sup>. Genes specifically expressed in  
406 the male germline have either massively amplified their copy numbers, or upregulated their  
407 expression levels on these evolving Y chromosomes. Such a difference can be explained by the  
408 fact that regardless of the sex chromosome type, sexual selection is often targeting males in  
409 most species, thus the Z/Y chromosomes are more frequently influenced than the W/X  
410 chromosome due to their male-biased transmission, although X chromosomes are nevertheless  
411 expected to accumulate recessive male-beneficial alleles<sup>9</sup>. The convergently evolved pattern  
412 shared between the mammalian Y and avian W chromosomes is largely attributed to the  
413 essential genes that have important regulatory functions and are preferentially retained over the  
414 long period of recombination suppression (**Fig. 4**)<sup>21,27</sup>. However, previous transcriptome  
415 comparison of chicken breeds selected for egg-laying vs. fighting, i.e. female-specific vs. male-  
416 specific traits, has found that most W-linked genes are upregulated in the former<sup>64</sup>. Few high-  
417 quality avian W chromosome sequences are available except for that of chicken<sup>21,65</sup>. Songbirds  
418 provide a rich resource with many species having a reversed direction of sexual selection and  
419 ornamented females<sup>66</sup>. Application of long-read sequencing technology in future will help to  
420 elucidate the role of the W chromosome in sexual selection and speciation of birds<sup>67</sup>.

421

## 422 **Materials and Methods**

### 423 **Genome assembly and annotation**

424 Genomic DNA were extracted from fresh female tissue samples of from BOP species  
425 *Cicinnurus regius* (ANWC B24969), *Cicinnurus magnificus* (ANWC B27061), *Paradisaea rubra*  
426 (YPM84686), *Parotia lawesii* (ANWC B26535), using Thermo Scientific™ KingFisher™ Duo  
427 Prime purification system. Paired-end and mate pair libraries for these samples were prepared  
428 by SciLifeLab in Stockholm, Sweden. All libraries were sequenced on Illumina HiSeq 2500 or  
429 Hiseq X v4 at SciLifeLab in Stockholm, Sweden. For *Paradisaea raggiana* (USNM638608),  
430 genomic DNA were extracted using EZNA SQ Tissue DNA Kit. One paired-end and one mate-  
431 pair libraries were sequenced on Illumina HiSeq 2000. We also used published female genomes  
432 of *Corvus brachyrhynchos*, *Serinus canaria*, *Passer domesticus*, *Geospiza fortis*, *Ficedula*  
433 *albicollis*, *Pseudopodoces humilis* for analysis in this work (**Supplementary Table 9**)<sup>30,36-39</sup>. The  
434 BOP genomes were assembled using ALLPATHS-LG<sup>68</sup> with 'HAPLOIDIFY=True'. For *P.*  
435 *raggiana*, due to the lack of overlapping paired-end reads, SOAPdenovo2<sup>69</sup> was used instead.  
436 Gene models were annotated using the MAKER pipeline in two rounds<sup>70</sup>. The reference protein  
437 sequences of zebra finch, great tit, hooded crow, American crow, collared flycatcher and  
438 chicken were downloaded from NCBI RefSeq (**Supplementary Table 9**). Using the reference  
439 protein sequences and chicken HMM (Hidden Markov Models), an initial set of gene models  
440 was obtained by using MAKER, and those models were taken for SNAP model training<sup>71</sup>. In  
441 addition, 3000 gene models were selected for Augustus training<sup>72</sup>. The trained gene models and  
442 the protein sequences were taken as input for MAKER in the second run. To annotate repeats,  
443 first we used RepeatModeler<sup>73</sup> to identify and classify repeat elements for each species,  
444 including the published genomes<sup>74</sup>. Then we combined each individual library with an avian  
445 repeat library and further manually curated BOP repeat consensus sequences, followed by  
446 annotation repeats using RepeatMasker (v1.7)<sup>73</sup>.

447

### 448 **Identification of sex-linked sequences**

449 We used the sequence of the great tit Z chromosome as reference to search for homologous Z-  
450 linked sequences in the studied species, as it has the best assembly quality (contig N50: 133kb,  
451 scaffold N50: 7.7Mb) among the published genomes of songbirds<sup>6</sup>. We used nucmer from  
452 MUMMer package (v4.0)<sup>75</sup> for genome-wide pairwise sequence alignment. For any scaffold  
453 larger than 10 kb that has more than 60% of the sequence aligned to great tit chrZ, it was  
454 identified as candidate Z-linked sequences. They were further inspected by comparing the  
455 female sequencing coverage to that of autosomes. To do so, the raw female reads were



456 mapped to the genome references by using bwa<sup>76</sup> then the mean sequencing depth of every 50-  
457 kb window was calculated. Sequencing depth for single sites was counted using 'samtools  
458 depth' before calculating window-based coverage. Any site with low mapping quality (less than  
459 60) and very high coverage (3 times larger than average) was excluded.

460 To identify the W-linked scaffolds, first we identified the scaffolds that show half-  
461 coverage relative to that of autosomes. We plotted the distribution of coverage of all scaffolds to  
462 decide the cutoff of 'half-coverage' (**Supplementary Fig.1**). Those half-coverage scaffolds were  
463 expected to be either Z-linked or W-linked. To distinguish between the Z and W, we aligned the  
464 half-coverage scaffolds to the Z chromosome from the hooded crow, a closely related species to  
465 BOP, whose genome is derived from a male without contamination of W-linked sequences. We  
466 used nucmer for sequence alignment and only kept 1-to-1 best alignments. We then calculated  
467 the proportion of sequences of each scaffold that was aligned to the hooded crow chrZ, and  
468 decided a cutoff to separate the Z and W based on the distribution of the proportion of Z-linked  
469 alignment. We further excluded the candidate W-linked scaffolds that over 10% of the  
470 sequences were aligned to hooded crow autosomes, or a larger portion of sequences aligned to  
471 the Z chromosome than the W. Finally, only the scaffolds that were larger than 50 kb were kept.  
472 We also retrieved additional Z-linked scaffolds that were absent in the results from the  
473 homology-based approach, likely due to the missing Z-linked sequences in the great tit Z  
474 chromosome assembly. For ground tit, medium ground finch, house sparrow and collared  
475 flycatcher in which both male and female sequencing reads are available, the W-linked  
476 sequences were further verified by mapping the male reads. Specifically, for every scaffold, the  
477 number of nucleotide sites that were covered by male and female sequencing data were  
478 counted respectively as Nm and Nf, and the ratios of Nm to Nf were calculated. W-linked  
479 scaffolds were expected to have Nm/Nf ratios close to zero and one for autosomal or Z-linked  
480 scaffolds. For PARs, we used the known sequences of the zebra finch<sup>77</sup> and collared  
481 flycatcher<sup>41</sup> to search for the homologous sequences in other species using nucmer. The female  
482 sequencing depths of those candidate PARs were compared to autosomes and required to be  
483 similar.

484

#### 485 **Demarcation of evolutionary strata**

486 We ordered and oriented the identified Z-linked scaffolds into one pseudo-chromosomal  
487 sequence (pseudo-chrZ) based on their alignments against the chromosomal assembly of great  
488 tit. Hooded crow has only 15 Z-linked scaffolds and 10 out of them are larger than 1 Mb<sup>47</sup>, thus  
489 was used as a representative Corvida species for comparison on the Z chromosome. We

490 determined the relative order and orientation of the scaffolds according to their alignment on the  
491 great tit Z chromosome. Similarly, for BOP species, we created pseudo-chromosome Z using  
492 great tit as guiding reference. The pseudo-Z chromosome of emu was built using ostrich Z  
493 chromosome<sup>78 79</sup> as reference. We used nucmer for pairwise alignment of the Z or pseudo-Z  
494 chromosomes. Alignments short than 2kb were excluded.

495 The W-linked scaffolds were then aligned to the pseudo-chrZ using lastz<sup>80</sup>, after masking  
496 repetitive sequences. Sequence similarity of the alignments between the chrZ and chrW was  
497 calculated by the script pslScore from UCSC Genome Browser (<https://genome.ucsc.edu/>).  
498 Individual alignments that had sequence similarity lower than 60 or higher than 96, or alignment  
499 length shorter than 65 were removed. After that, we concatenated alignments within non-  
500 overlapping sliding windows of 100 kb, and calculated sequence similarity for the concatenated  
501 alignments. When the length of concatenated alignments was shorter than 2 kb within a 100-kb  
502 window, the window was excluded from further analyses. The window-based sequence  
503 similarity was then plotted along the pseudo-chrZ. The shift of sequence similarity was used to  
504 demarcate the boundaries of S3/S2 and S2/S1. Since very few W-linked sequences have been  
505 assembled for the most ancient stratum S0, we mapped its reshuffled fragments in songbirds  
506 based on their homology with the emu S0. Our previous study showed emu has a recent  
507 species-specific stratum (S1) while the first stratum (S0) is ancient and shared by all birds<sup>20</sup>.  
508 This allows for the demarcation of S1 and S0 by detecting their differential degree of ZW  
509 differentiation. Specifically, by using relatively relaxed mapping criteria (bwa mem) to map  
510 female sequencing reads, only S0 showed reduced coverage relative to autosomes or PAR  
511 (**Supplementary Fig. 4**), while S1 showed reduced coverage when stringent mapping was  
512 applied (bwa sampe -a 900 -n 1 -N 0 -o 10000).

513 To scrutinize the accumulated LINE (mostly CR1) elements at the PAR/S3 boundary, we  
514 first divided them into each subfamily (approximated by each repeat consensus sequence)  
515 according to the RepeatMasker annotation. Among all subtypes, CR1-E1 is usually ranked with  
516 the highest or second highest number at the S3 region across all songbird species. Other high-  
517 ranking subtypes included CR1-E3, CR1-E5, CR1-E4, CR1-E6, CR1-J2 and CR1-Y2. Then we  
518 plotted each subtype's abundance with a 100 kb non-overlapping window along the Z  
519 chromosome, in all the studied songbirds, as well as outgroup species rifleman and falcon<sup>81</sup>, to  
520 identify the burst of CR1-E1.

521

522 **Sex-linked gene analyses**

523 After removing LTR-derived genes, we used BLAT<sup>82</sup> to align the annotated coding sequences of  
524 W-linked genes to the Z chromosome to search for their gametologous pairs. Then we produced  
525 pairwise gametolog alignments using MUSCLE,<sup>83</sup> and then manually inspected the alignments  
526 to remove genes with short or ambiguous alignments. For species other than the BOPs, gene  
527 models of the W chromosomes were directly retrieved from the RefSeq genome annotation,  
528 with some of them subjected to manual inspections. To determine the orthologous relationship  
529 among the studied species, we first extracted the sequence of the longest protein of each gene.  
530 Those protein sequences were subjected to all-vs-all BLAST search that was implemented  
531 through the program proteinortho<sup>84</sup>. BLAST hits with identity lower than 50% or alignment  
532 coverage lower than 50% were removed. We also took gene synteny information into account  
533 when grouping orthologous genes. Besides the twelve female genomes for which we studied  
534 the sex chromosomes, we also included high-quality genomes of great tit, hooded crow and  
535 ostrich (**Supplementary Table 9**). We retained those orthologous groups if they contained  
536 sequences of at least ten species.

537 To estimate the substitution rates of coding sequences, first we performed multiple  
538 sequence alignments for orthologous genes. We used the guidance2 pipeline  
539 (<http://guidance.tau.ac.il/ver2/source.php>) which employs PRANK to align sequences of codons.  
540 To filter low-quality sites in the alignments, we ran trimal (<http://trimal.cgenomics.org/>) to further  
541 filter the ambiguous alignments with '-gt 0.8'. The phylogeny of the birds was extracted from  
542 Jetz et al. (2012)<sup>85</sup>. We used codeml from the PAML package<sup>86</sup> to estimate the synonymous  
543 substitution rates (dS) and non-synonymous substitution rates (dN). To estimate chromosome-  
544 wide dN and dS, the sums of synonymous or nonsynonymous substitutions were divided by  
545 those of the number of synonymous or nonsynonymous sites, as applied in Wright et al.<sup>19</sup>.  
546 Individual genes with abnormal dN (higher than 0.1, in total 179 genes) or dS (higher than 0.8,  
547 in total 135 genes) out of 111,748 orthologous gene groups were removed. Confidence intervals  
548 were calculated by 100 bootstraps. The GC content of the third position codons (GC3) was  
549 calculated using codonW<sup>87</sup> for the longest isoform of each gene. Chromosome-wide dN/dS ( $\omega$ )  
550 was calculated using the ratios of chromosome-wide dN to chromosome-wise dS. The fast-Z  
551 effect is measured by Z/A value, the ratio of  $\omega$  values of Z-linked genes to autosomal genes,  
552 and we calculated the Z/A value for every terminal branch and internal branch. To determine  
553 whether the difference of  $\omega$  between Z-linked and autosomal genes was significant, we  
554 performed permutation test by resampling 1000 times. The genes of chromosome 4 and  
555 chromosome 5 were used to represent autosomal genes as the sizes of those two  
556 chromosomes are similar to the Z chromosome.

557 For each gametologous pair, we grouped together Z-linked genes and assembled W-  
558 linked genes and performed multiple sequence alignment. The same guidance2 pipeline was  
559 used as in sequence divergence analysis. For S3 genes, we also included rifleman<sup>36</sup>. We used  
560 IQTREE<sup>88</sup> to construct maximum likelihood phylogenetic trees. The best substitution model was  
561 automatically selected in by IQ-TREE. We ran 100 bootstraps to evaluate the confidence levels  
562 of phylogenies. Ostrich was used as the outgroup to root the tree. The gene ontology (GO) term  
563 annotations for both gametolog-pairs genes (list) and entire Z-linked genes (background) of  
564 chicken were analyzed using DAVID 6.8<sup>89</sup>. GO term enrichment was analyzed by comparing the  
565 number of appearance of GO terms of 'list' gene versus 'background' gene.

566

### 567 **Gene loss analysis**

568 We identified a total of 673 Z-linked orthologous genes that are shared between chicken and  
569 emu as the putative ancestral genes on the proto-sex chromosomes of birds. For the gene  
570 cluster that was lost in chicken at the DCC locus of S3, an ancestral gene content was inferred  
571 based on Fig. 3 of Patthey et al.<sup>53</sup>. They were then grouped into four evolutionary strata  
572 according to the strata annotation of songbird Z chromosomes. At each node of the avian  
573 phylogenetic tree, we calculated the ratio of the number of lost genes to the number of ancestral  
574 genes at that node. For the nodes leading to Passerida and Corvida, if there were at least one  
575 species retaining a W-linked gene, we inferred that this gene was present in their ancestor.  
576 Similarly, we defined the presence of ancestral genes in Passeriformes, Neoaves and  
577 Neognathae using other published avian W-linked gene information<sup>20,21</sup>.

578

### 579 **Gene expression analysis**

580 We downloaded the raw RNA-seq reads of green anole (brain, gonad, liver, heart and kidney)  
581 and emu (brain, gonad and spleen) from SRA (**Supplementary Table 9**). In addition, we  
582 collected transcriptomes of adult emu kidneys of both sexes. We used the RSEM pipeline<sup>90</sup> to  
583 quantify the gene expression levels. We used STAR<sup>91</sup> to map raw reads to the transcriptomes  
584 which was constructed based on gene annotations. The expression levels were estimated at the  
585 gene level, in the form of TPM (Transcripts Per Million). The mean TPM value of biological  
586 replicates was calculate for each gene. Tissue specificity of gene expression was estimated by  
587 calculating tau<sup>92</sup>.

588

### 589 **Data availability**

590 Genome sequencing and RNA-seq data, and genome assemblies generated in this study have  
591 been deposited in the NCBI SRA under PRJNA491255.

592

### 593 **Acknowledgements**

594 We thank Australian National Wildlife Collection, CSIRO Sustainable Ecosystems (Leo Joseph),  
595 Museum Victoria, Australia (Joanna Sumner), Division of Vertebrate Zoology Yale University,  
596 Peabody Museum of Natural History (Kristof Zyskowski) for tissue samples; and Edwin Scholes  
597 for discussions on birds-of-paradise. We also acknowledge the support from Science for Life  
598 Laboratory, the National Genomics Infrastructure (NGI), Uppmax. L.X. is supported by the  
599 uni:doc PhD. fellowship from University of Vienna. M.I. is supported by the Swedish Research  
600 Council (grant number 621-2014-5113). A.S. is supported by the Swedish Research Council  
601 (grant number 2016-05139) and thanks Muhammad Bilal for help with repeat annotations. Q.Z.  
602 is supported by National Natural Science Foundation of China (31722050, 31671319), the  
603 Thousand Talents Plan, the Fundamental Research Funds for the Central Universities, and  
604 start-up funds from Zhejiang University. The computational analyses were performed on CUBE  
605 cluster from Dept. of Computational System Biology of University of Vienna and Vienna  
606 Scientific Cluster.

607

### 608 **Figure Legend**

#### 609 **Figure 1. The Z and W chromosomes of different songbirds.**

610 **A)** We use medium ground finch as an example to demonstrate our identification and  
611 verification of sex-linked sequences. For each scaffold shown as a circle with scaled size to its  
612 length, the ratio of nucleotide sites that were mapped by male vs. female genomic reads is  
613 plotted against the sequencing depth of this scaffold. Scaffold sequences are clustered  
614 separately by their derived chromosomes with W-linked (red circles) and Z-linked (blue circles)  
615 sequences showing the expected half the autosome (green) sequencing depth, and W-linked  
616 sequences showing almost no mappable sites from male reads. **B)** The lengths of Z and W  
617 chromosomes across the studied songbird species. The shorter length of raggiana BOP W  
618 chromosome is probably caused by the low sequencing coverage. Species name marked in  
619 blue are those that have male reads available for verifying the female-specificity of W-linked  
620 sequences.

621

#### 622 **Figure 2. Evolution strata of songbirds.**

623 **A)** Genomic synteny of the avian Z chromosomes. Each color represents one evolutionary  
624 stratum of songbirds which does not apply to chicken or emu, as they have independent origins  
625 of evolutionary strata except for S0. The location of *DMRT1*, the avian male-determining gene is  
626 marked by the red dashed line. Generally, the synteny is more conserved in younger strata  
627 between species. **B)** We use Lawes's parotia as an example to demonstrate the pairwise  
628 sequence similarity pattern of evolutionary strata. The size of circles is scaled to the length of  
629 sequence alignments between Z/W chromosomes. **C)** Transposable elements (LINEs and LTRs)  
630 are more strongly enriched in older strata (S0 is the first stratum) except for LINEs at S3. Levels  
631 of significance comparing neighboring strata are tested by Wilcoxon test and shown with  
632 asterisks: '\*\*\*':  $P < 0.001$ , '\*\*':  $P < 0.01$ , '\*':  $P < 0.05$ . **D)** Lineage-specific burst of CR1-E1 (a  
633 subfamily of CR-1 LINEs, red line) at the boundary of the PAR and S3 in songbirds, since their  
634 divergence with other passerine species. Other subfamilies of CR1 elements are also plotted  
635 with the green line for comparison. **E)** Phylogenetic tree using Z- and W-linked gametolog  
636 sequences of the gene *C18orf25* located at S3. Lineages are clustered by chromosomes (red or  
637 blue), not by species, suggesting S3 independently formed in rifleman, chicken and the ancestor  
638 of songbirds.

639

### 640 **Figure 3. Fast-Z evolution of songbirds.**

641 We show the difference of evolutionary rates between Z-linked genes vs. autosomal genes (Z/A  
642 value), as a measurement of fast-Z effect throughout the lineages of studied songbird species.  
643 The tree length and color is scaled to the Z/A value, with lineages that show a significant  
644 (permutation test,  $P < 0.05$ ) fast-Z pattern labelled with asterisks. '\*\*\*':  $P < 0.001$ , '\*\*':  $P < 0.01$ , '\*':  
645  $P < 0.05$ . We also labelled their information mating systems ('monogamy' vs. 'polygamy'), and  
646 male display type<sup>54</sup> ('lekking', 'exploded lekking', 'solitary display').

647

### 648 **Figure 4. W-linked genes are preserved by purifying selection.**

649 **A)** We show the retained W-linked genes of each studied songbird species, as well as those of  
650 chicken, with homologous genes aligned vertically. The order of genes follows that of their emu  
651 homologs along the Z chromosome. The colors represent the evolutionary strata among  
652 songbirds. **B)** The Z-linked genes without W-linked homologs (green, 'Lost') evolve faster than  
653 those with W-linked homologs retained (red, 'Retained'), as indicated by their branch lengths  
654 scaled to dN/dS ratios. **C)** The Z-linked genes whose W-linked homologs have become lost  
655 (upper panel) tend to have a higher expression level (measured by TPM) in their lizard orthologs  
656 than those with W-linked homologs retained (lower panel). The genes are divided further by the



657 stratum they reside on, and the expression level is shown by log-transformed medium  
658 expression values of each category as color-coded heatmap. **D)** Gene expression tissue  
659 specificity in green anole lizard for the homologous avian Z-linked genes.

660

661 **Figure 5. Comparison of gene loss between W chromosomes of songbirds and Y**  
662 **chromosomes of primates.**

663 **A)** We show the percentage of gene loss, and ancestral gene number for each evolutionary  
664 stratum at each phylogenetic node. **B)** Similar analyses for the Y-linked gametologs of primates  
665 based on the data of <sup>21</sup>, with S1 as the first stratum of eutherian mammals. **C)** We show the  
666 length of songbird W or primate Y chromosomes scaled to the ancestral gene number of each  
667 evolutionary stratum, with the color scaled to the overall percentage of gene loss. The ages of  
668 evolutionary strata are indicated by the number (in millions of years) at the nodes below the  
669 bars. As eutherian mammals have much larger ancestral evolutionary strata than those of birds,  
670 they probably suffer a more severe gene loss on the Y chromosome.

671

672 **Reference**

- 673 1. IOC World Bird List 8.2.  
674 2. Barker, F.K., Cibois, A., Schikler, P., Feinstein, J. & Cracraft, J. Phylogeny and  
675 diversification of the largest avian radiation. *Proc Natl Acad Sci U S A* **101**, 11040-5  
676 (2004).  
677 3. Ellegren, H. *et al.* The genomic landscape of species divergence in *Ficedula* flycatchers.  
678 *Nature* **491**, 756-760 (2012).  
679 4. Poelstra, J.W. *et al.* The genomic landscape underlying phenotypic integrity in the face  
680 of gene flow in crows. *Science* **344**, 1410-1414 (2014).  
681 5. Tuttle, E.M. *et al.* Divergence and functional degradation of a sex chromosome-like  
682 supergene. *Curr Biol* **26**, 344-50 (2016).  
683 6. Laine, V.N. *et al.* Evolutionary signals of selection on cognition from the great tit genome  
684 and methylome. *Nat Commun* **7**, 10474 (2016).  
685 7. Mank, J.E. Sex chromosomes and the evolution of sexual dimorphism: lessons from the  
686 genome. *Am Nat* **173**, 141-50 (2009).  
687 8. Coyne, J.A. Genetics and speciation. *Nature* **355**, 511 (1992).  
688 9. Charlesworth, B., Coyne, J. & Barton, N. The relative rates of evolution of sex  
689 chromosomes and autosomes. *Am Nat* **130**, 113-146 (1987).  
690 10. Smeds, L. *et al.* Evolutionary analysis of the female-specific avian W chromosome. *Nat.*  
691 *Commun.* **6**, 7330 (2015).  
692 11. Hooper, D.M. & Price, T.D. Chromosomal inversion differences correlate with range  
693 overlap in passerine birds. *Nat Ecol Evol* **1**, 1526-1534 (2017).  
694 12. Backström, N. *et al.* A high-density scan of the Z chromosome in *Ficedula* flycatchers  
695 reveals candidate loci for diversifying selection. *Evolution* **64**, 3461-3475 (2010).  
696 13. Elgvin, T.O. *et al.* Hybrid speciation in sparrows II: a role for sex chromosomes? *Mol*  
697 *Ecol* **20**, 3823-37 (2011).

- 698 14. Storchová, R., Reif, J. & Nachman, M.W. Female heterogamety and speciation: reduced  
699 introgression of the Z chromosome between two species of nightingales. *Evolution* **64**,  
700 456-471 (2010).
- 701 15. Ellegren, H. *et al.* The genomic landscape of species divergence in *Ficedula* flycatchers.  
702 *Nature* **491**, 756-60 (2012).
- 703 16. Li, W.H., Yi, S. & Makova, K. Male-driven evolution. *Curr Opin Genet Dev* **12**, 650-6  
704 (2002).
- 705 17. Vicoso, B. & Charlesworth, B. Effective population size and the faster-X effect: an  
706 extended model. *Evolution* **63**, 2413-26 (2009).
- 707 18. Mank, J.E., Nam, K. & Ellegren, H. Faster-Z evolution is predominantly due to genetic  
708 drift. *Mol Biol Evol* **27**, 661-670 (2010).
- 709 19. Wright, A.E. *et al.* Variation in promiscuity and sexual selection drives avian rate of  
710 Faster-Z evolution. *Mol Ecol* **24**, 1218-35 (2015).
- 711 20. Zhou, Q. *et al.* Complex evolutionary trajectories of sex chromosomes across bird taxa.  
712 *Science* **346**, 1246338 (2014).
- 713 21. Bellott, D.W. *et al.* Avian W and mammalian Y chromosomes convergently retained  
714 dosage-sensitive regulators. *Nat Genet* **49**, 387-394 (2017).
- 715 22. Charlesworth, D., Charlesworth, B. & Marais, G. Steps in the evolution of heteromorphic  
716 sex chromosomes. *Heredity* **95**, 118-28 (2005).
- 717 23. Bachtrog, D. Y-chromosome evolution: emerging insights into processes of Y-  
718 chromosome degeneration. *Nat Rev Genet* **14**, 113-24 (2013).
- 719 24. Soh, Y.Q. *et al.* Sequencing the mouse Y chromosome reveals convergent gene  
720 acquisition and amplification on both sex chromosomes. *Cell* **159**, 800-13 (2014).
- 721 25. Charlesworth, B. & Charlesworth, D. The degeneration of Y chromosomes. *Philos Trans  
722 R Soc Lond B Biol Sci* **355**, 1563-72 (2000).
- 723 26. Bachtrog, D. The temporal dynamics of processes underlying Y chromosome  
724 degeneration. *Genetics* **179**, 1513-25 (2008).
- 725 27. Bellott, D.W. *et al.* Mammalian Y chromosomes retain widely expressed dosage-  
726 sensitive regulators. *Nature* **508**, 494-499 (2014).
- 727 28. Zhou, Q. & Bachtrog, D. Sex-specific adaptation drives early sex chromosome evolution  
728 in *Drosophila*. *Science* **337**, 341-345 (2012).
- 729 29. Koerich, L.B., Wang, X., Clark, A.G. & Carvalho, A.B. Low conservation of gene content  
730 in the *Drosophila* Y chromosome. *Nature* **456**, 949-51 (2008).
- 731 30. Smeds, L. *et al.* Evolutionary analysis of the female-specific avian W chromosome. *Nat  
732 Commun* **6**, 7330 (2015).
- 733 31. Cortez, D. *et al.* Origins and functional evolution of Y chromosomes across mammals.  
734 *Nature* **508**, 488-93 (2014).
- 735 32. Bergero, R., Forrest, A., Kamau, E. & Charlesworth, D. Evolutionary strata on the X  
736 chromosomes of the dioecious plant *Silene latifolia*: evidence from new sex-linked genes.  
737 *Genetics* **175**, 1945-1954 (2007).
- 738 33. Lahn, B.T. & Page, D.C. Four evolutionary strata on the human X chromosome. *Science*  
739 **286**, 964-7 (1999).
- 740 34. Gorelick, R. *et al.* Abrupt shortening of bird W chromosomes in ancestral Neognathae.  
741 *Biol. J. Linn. Soc. Lond.* **119**, 488-496 (2016).
- 742 35. Rice, W.R. The accumulation of sexually antagonistic genes as a selective agent  
743 promoting the evolution of reduced recombination between primitive sex chromosomes.  
744 *Evolution* **41**, 911-914 (1987).
- 745 36. Zhang, G. *et al.* Comparative genomics reveals insights into avian genome evolution and  
746 adaptation. *Science* **346**, 1311-1320 (2014).
- 747 37. Frankl-Vilches, C. *et al.* Using the canary genome to decipher the evolution of hormone-  
748 sensitive gene regulation in seasonal singing birds. *Genome Biol* **16**, 19 (2015).

- 749 38. Qu, Y. *et al.* Ground tit genome reveals avian adaptation to living at high altitudes in the  
750 Tibetan plateau. *Nat Commun* **4**, 2071 (2013).
- 751 39. Elgvin, T.O. *et al.* The genomic mosaicism of hybrid speciation. *Sci Adv* **3**, e1602996  
752 (2017).
- 753 40. Claramunt, S. & Cracraft, J. A new time tree reveals Earth history's imprint on the  
754 evolution of modern birds. *Science Advances* **1**, e1501005-e1501005 (2015).
- 755 41. Smeds, L. *et al.* Genomic identification and characterization of the pseudoautosomal  
756 region in highly differentiated avian sex chromosomes. *Nat Commun* **5**, 5448 (2014).
- 757 42. Pala, I. *et al.* Evidence of a neo-sex chromosome in birds. *Heredity* **108**, 264-72 (2012).
- 758 43. Suh, A., Smeds, L. & Ellegren, H. Abundant recent activity of retrovirus-like  
759 retrotransposons within and among flycatcher species implies a rich source of structural  
760 variation in songbird genomes. *Mol Ecol* **27**, 99-111 (2018).
- 761 44. Kapusta, A. & Suh, A. Evolution of bird genomes—a transposon's-eye view. *Ann N Y*  
762 *Acad Sci* **1389**, 164-185 (2017).
- 763 45. Gorelick, R. *et al.* Abrupt shortening of bird W chromosomes in ancestral Neognathae.  
764 *Biological Journal of the Linnean Society* **119**, 488-496 (2016).
- 765 46. Ross, M.T. *et al.* The DNA sequence of the human X chromosome. *Nature* **434**, 325-37  
766 (2005).
- 767 47. Poelstra, J.W. *et al.* The genomic landscape underlying phenotypic integrity in the face  
768 of gene flow in crows. *Science* **344**, 1410-4 (2014).
- 769 48. Wright, A.E., Dean, R., Zimmer, F. & Mank, J.E. How to make a sex chromosome. *Nat*  
770 *Commun* **7**, 12087 (2016).
- 771 49. Duret, L. & Galtier, N. Biased gene conversion and the evolution of mammalian genomic  
772 landscapes. *Annu Rev Genomics Hum Genet* **10**, 285-311 (2009).
- 773 50. Kent, T.V., Uzunović, J. & Wright, S.I. Coevolution between transposable elements and  
774 recombination. *Phil Trans R Soc B* **372**, 20160458 (2017).
- 775 51. Suh, A. *et al.* Mesozoic retrotransposons reveal parrots as the closest living relatives of  
776 passerine birds. *Nat Commun* **2**, 443 (2011).
- 777 52. Friocourt, F. *et al.* Recurrent DCC gene losses during bird evolution. *Sci Rep* **7**, 37569  
778 (2017).
- 779 53. Patthey, C., Tong, Y.G., Tait, C.M. & Wilson, S.I. Evolution of the functionally conserved  
780 DCC gene in birds. *Sci Rep* **7**, 42029 (2017).
- 781 54. Irestedt, M., Jonsson, K.A., Fjeldsa, J., Christidis, L. & Ericson, P.G. An unexpectedly  
782 long history of sexual selection in birds-of-paradise. *BMC Evol Biol* **9**, 235 (2009).
- 783 55. Diamond, J. Biology of birds of paradise and bowerbirds. *Ann Rev Ecol Syst* **17**, 17-37  
784 (1986).
- 785 56. Kirkpatrick, M. & Ryan, M.J. The evolution of mating preferences and the paradox of the  
786 lek. *Nature* **350**, 33-38 (1991).
- 787 57. Suh, A. The Specific Requirements for CR1 Retrotransposition Explain the Scarcity of  
788 Retrogenes in Birds. *J. Mol. Evol.* **81**, 18-20 (2015).
- 789 58. Stock, M. *et al.* Ever-young sex chromosomes in European tree frogs. *PLoS Biol* **9**,  
790 e1001062 (2011).
- 791 59. Vicoso, B., Emerson, J.J., Zektser, Y., Mahajan, S. & Bachtrog, D. Comparative sex  
792 chromosome genomics in snakes: differentiation, evolutionary strata, and lack of global  
793 dosage compensation. *PLoS Biol* **11**, e1001643 (2013).
- 794 60. Charlesworth, D. Evolution of recombination rates between sex chromosomes. *Philos*  
795 *Trans R Soc Lond B Biol Sci* **372**(2017).
- 796 61. Lemaitre, C. *et al.* Footprints of inversions at present and past pseudoautosomal  
797 boundaries in human sex chromosomes. *Genome Biol Evol* **1**, 56-66 (2009).

- 798 62. Knief, U. *et al.* Fitness consequences of polymorphic inversions in the zebra finch  
799 genome. *Genome Biol* **17**, 199 (2016).
- 800 63. Campagna, L. *et al.* Repeated divergent selection on pigmentation genes in a rapid finch  
801 radiation. *Sci Adv* **3**, e1602404 (2017).
- 802 64. Moghadam, H.K., Pointer, M.A., Wright, A.E., Berlin, S. & Mank, J.E. W chromosome  
803 expression responds to female-specific selection. *Proc Natl Acad Sci U S A* **109**, 8207-  
804 11 (2012).
- 805 65. Peona, V., Weissensteiner, M.H. & Suh, A. How complete are “complete” genome  
806 assemblies?—An avian perspective. *Mol Ecol Resour.* **0**.
- 807 66. Amundsen, T. Why are female birds ornamented? *Trends Ecol Evol* **15**, 149-155 (2000).
- 808 67. Irwin, D.E. Sex chromosomes and speciation in birds and other ZW systems. *Mol Ecol*  
809 **27**, 3831-3851 (2018).
- 810 68. Gnerre, S. *et al.* High-quality draft assemblies of mammalian genomes from massively  
811 parallel sequence data. *Proc. Natl. Acad. Sci. U. S. A.* **108**, 1513-1518 (2011).
- 812 69. Luo, R. *et al.* SOAPdenovo2: an empirically improved memory-efficient short-read de  
813 novo assembler. *Gigascience* **1**, 18 (2012).
- 814 70. Cantarel, B.L. *et al.* MAKER: an easy-to-use annotation pipeline designed for emerging  
815 model organism genomes. *Genome Res* **18**, 188-196 (2008).
- 816 71. Korf, I. Gene finding in novel genomes. *BMC Bioinformatics* **5**, 59 (2004).
- 817 72. Stanke, M. & Waack, S. Gene prediction with a hidden Markov model and a new intron  
818 submodel. *Bioinformatics* **19**, ii215-ii225 (2003).
- 819 73. <http://www.repeatmasker.org>.
- 820 74. Prost, S. *et al.* Genome analyses show strong selection on coloration, morphological and  
821 behavioral phenotypes in birds-of-paradise. *bioRxiv*, 287086 (2018).
- 822 75. Marçais, G. *et al.* MUMmer4: A fast and versatile genome alignment system. *PLoS*  
823 *Comput Biol* **14**, e1005944 (2018).
- 824 76. Li, H. Aligning sequence reads, clone sequences and assembly contigs with BWA-MEM.  
825 (2013).
- 826 77. Singhal, S. *et al.* Stable recombination hotspots in birds. *Science* **350**, 928-32 (2015).
- 827 78. Yazdi, H.P. & Ellegren, H. A genetic map of ostrich Z chromosome and the role of  
828 inversions in avian sex chromosome evolution. *Genome Biol Evol* **10**, 2049-2060 (2018).
- 829 79. Zhang, J., Li, C., Zhou, Q. & Zhang, G. Improving the ostrich genome assembly using  
830 optical mapping data. *GigaScience* **4**, 24 (2015).
- 831 80. Harris, R.S. The Pennsylvania State University (2017).
- 832 81. Zhan, X. *et al.* Peregrine and saker falcon genome sequences provide insights into  
833 evolution of a predatory lifestyle. *Nat Genet* **45**, 563-6 (2013).
- 834 82. Hancock, J.M. BLAT (BLAST-like Alignment Tool). in *Dictionary of Bioinformatics and*  
835 *Computational Biology* (2004).
- 836 83. Edgar, R.C. MUSCLE: multiple sequence alignment with high accuracy and high  
837 throughput. *Nucleic Acids Res* **32**, 1792-1797 (2004).
- 838 84. Lechner, M. *et al.* Proteinortho: detection of (co-)orthologs in large-scale analysis. *BMC*  
839 *Bioinformatics* **12**, 124 (2011).
- 840 85. Jetz, W., Thomas, G.H., Joy, J.B., Hartmann, K. & Mooers, A.O. The global diversity of  
841 birds in space and time. *Nature* **491**, 444-448 (2012).
- 842 86. Yang, Z. PAML 4: phylogenetic analysis by maximum likelihood. *Mol Biol Evol* **24**, 1586-  
843 1591 (2007).
- 844 87. Peden, J. <http://codonw.sourceforge.net/culong.html>.
- 845 88. Nguyen, L.-T., Schmidt, H.A., von Haeseler, A. & Minh, B.Q. IQ-TREE: a fast and  
846 effective stochastic algorithm for estimating maximum-likelihood phylogenies. *Mol Biol*  
847 *Evol* **32**, 268-274 (2015).

- 848 89. Jiao, X. *et al.* DAVID-WS: a stateful web service to facilitate gene/protein list analysis.  
849 *Bioinformatics* **28**, 1805-1806 (2012).
- 850 90. Li, B. & Dewey, C.N. RSEM: accurate transcript quantification from RNA-Seq data with  
851 or without a reference genome. *BMC Bioinformatics* **12**, 323 (2011).
- 852 91. Dobin, A. *et al.* STAR: ultrafast universal RNA-seq aligner. *Bioinformatics* **29**, 15-21  
853 (2013).
- 854 92. Yanai, I. *et al.* Genome-wide midrange transcription profiles reveal expression level  
855 relationships in human tissue specification. *Bioinformatics* **21**, 650-9 (2005).  
856

857 **Figure 1. The Z and W chromosomes of different songbirds.**

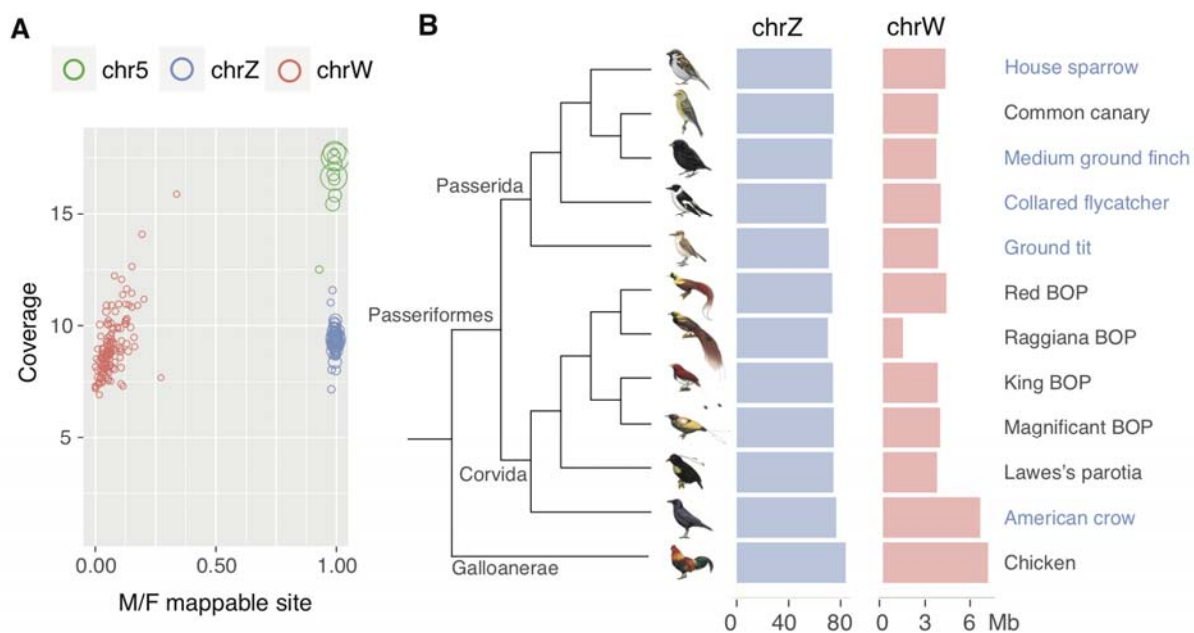

858



859 **Figure 2. Evolutionary strata of songbirds.**

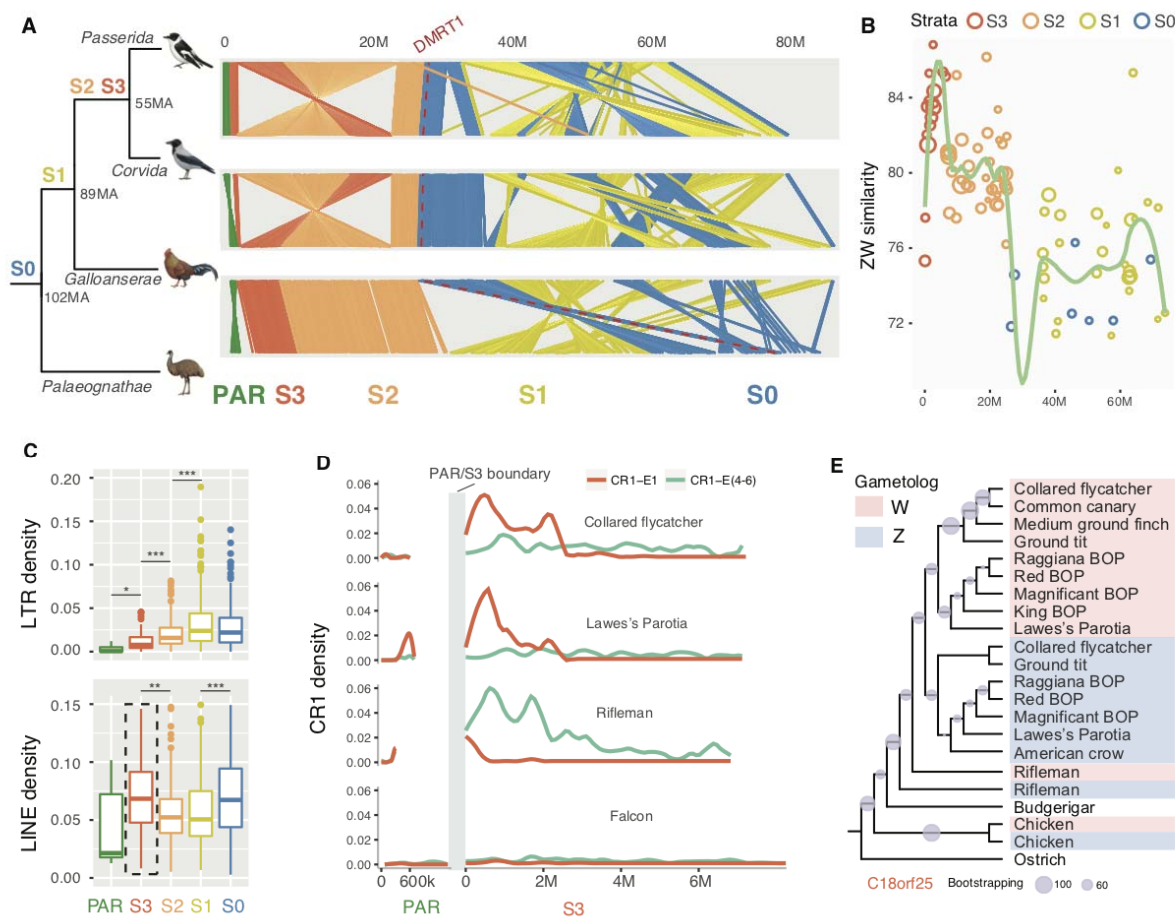

860

861 **Figure 3. Fast-Z evolution of songbirds**

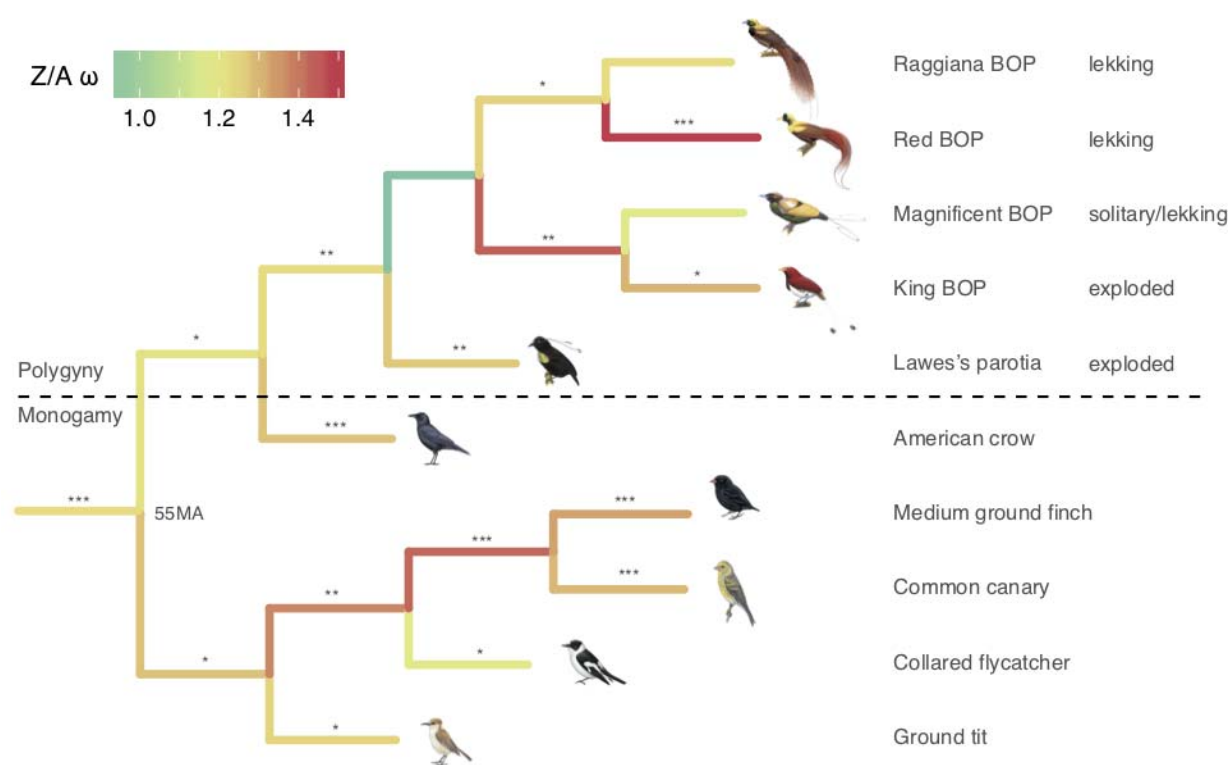

862

863 **Figure 4. W-linked genes are preserved by purifying selection.**

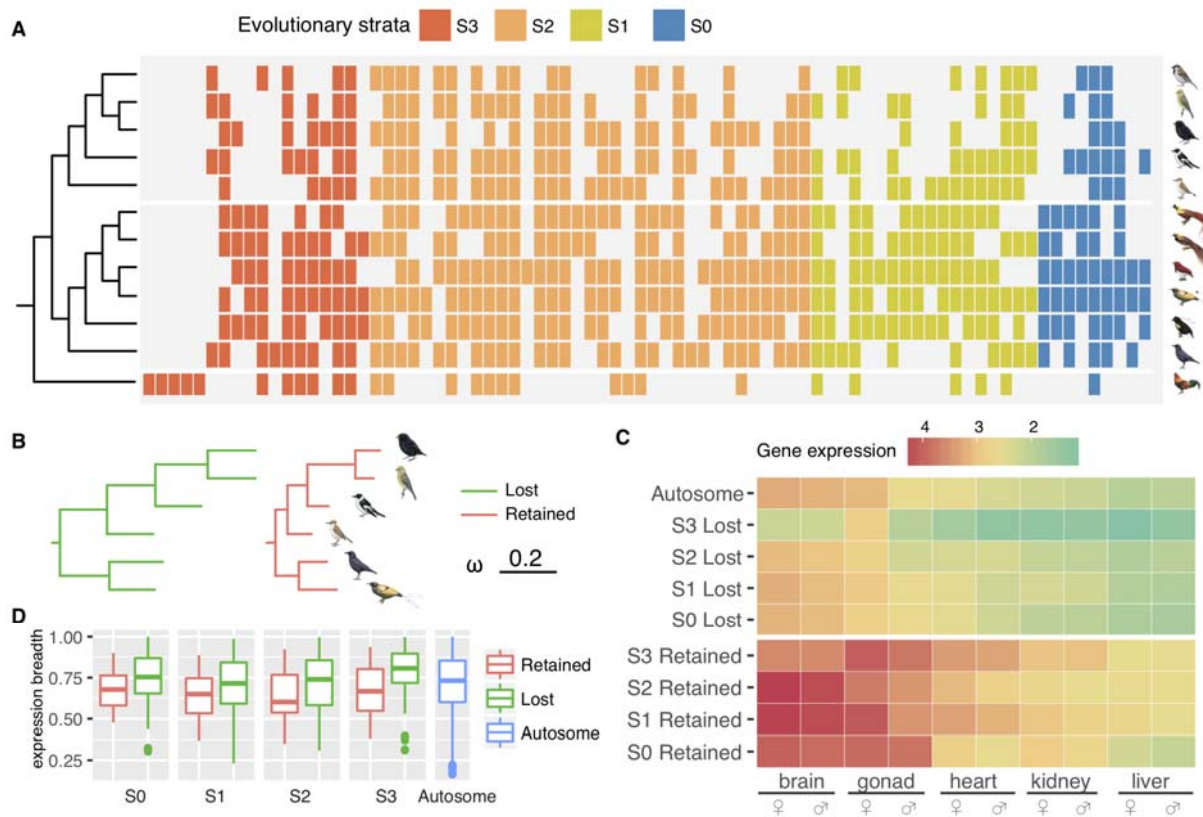

864

865 **Figure 5. Comparison of gene loss between W chromosomes of songbirds and Y**  
 866 **chromosomes of primates.**

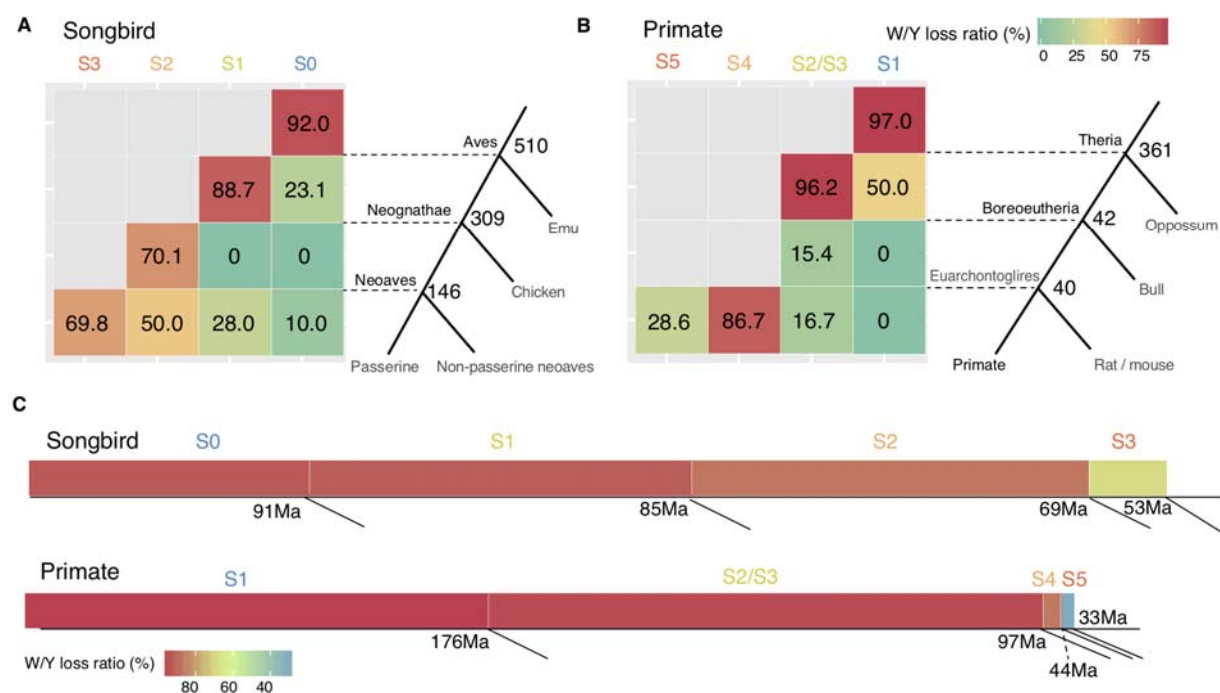

867
